# Supplementary material for: Systems Biology Analysis of Gene Expression during In Vivo Mycobacterium avium paratuberculosis Enteric Colonization Reveals Role for Immune Tolerance
Source: PLoS One. 2012 Aug 17;7(8):e42127. doi: 10.1371/journal.pone.0042127 (PMC3422314; doi:10.1371/journal.pone.0042127)
Supplement: Table S1 — Significantly Perturbed GO Categories for Early Phase Response. List of significantly perturbed gene ontology categories of biological processes for the Early Phase time period (30 and 60 minutes post-infection). Scores are determined by Dynamic Bayesian Gene Group Activation technique as explained in the text. (XLS) [file pone.0042127.s002.xls]

## Sheet: Sheet1
Table S1. Significantly Perturbed GO Categories for Early Phase Response.
GO Category	Description	t=30	t=60
regulation of ossification	Any process that modulates the frequency, rate or extent of bone formation.	4.77	0
mechanosensory behavior	Behavior that is dependent upon the sensation of a mechanical stimulus.	4.27	0.27
gonad development	The process whose specific outcome is the progression of the gonad over time, from its formation to the mature structure. The gonad is an animal organ that produces gametes; in some species it also produces hormones.	4.22	-0.27
heme biosynthetic process	The chemical reactions and pathways resulting in the formation of heme, any compound of iron complexed in a porphyrin (tetrapyrrole) ring, from less complex precursors.	4.07	0
response to protozoan	A change in state or activity of a cell or an organism (in terms of movement, secretion, enzyme production, gene expression, etc.) as a result of a stimulus from a protozoan.	4.06	0
early endosome to late endosome transport	The directed movement of substances, in membrane-bounded vesicles, from the early sorting endosomes to the late sorting endosomes; transport occurs along microtubules and can be experimentally blocked with microtubule-depolymerizing drugs.	4.03	0
cellular calcium ion homeostasis	The regulation of the levels, transport, and metabolism of calcium ions within a cell or between a cell and its external environment.	3.99	0
aerobic respiration	The enzymatic release of energy from organic compounds (especially carbohydrates and fats) which requires oxygen as the terminal electron acceptor.	3.8	0
peripheral nervous system development	The process whose specific outcome is the progression of the peripheral nervous system over time, from its formation to the mature structure. The peripheral nervous system is one of the two major divisions of the nervous system. Nerves in the PNS connect the central nervous system (CNS) with sensory organs, other organs, muscles, blood vessels and glands.	3.76	0
melanosome organization	A process that is carried out at the cellular level which results in the formation, arrangement of constituent parts, or disassembly of a melanosome. A melanosome is a tissue-specific, membrane-bounded cytoplasmic organelle within which melanin pigments are synthesized and stored.	3.72	0
positive regulation of interleukin-8 biosynthetic process	Any process that activates or increases the frequency, rate or extent of the chemical reactions and pathways resulting in the formation of interleukin-8.	3.68	-0.15
induction of apoptosis by oxidative stress	The activation, by oxidative stress, of any of the steps required for cell death by apoptosis.	3.58	0
induction of apoptosis by extracellular signals	Any process induced by extracellular signals that directly activates any of the steps required for cell death by apoptosis.	3.57	0
proximal/distal pattern formation	The regionalization process by which specific areas of cell differentiation are determined along a proximal/distal axis. The proximal/distal axis is defined by a line that runs from main body (proximal end) of an organism outward (distal end).	3.55	0
protein export from nucleus	The directed movement of a protein from the nucleus into the cytoplasm.	3.55	0
cilium assembly	The assembly of a cilium, a specialized eukaryotic locomotor organelle that consists of a filiform extrusion of the cell surface. Each cilium is bounded by an extrusion of the cytoplasmic membrane, and contains a regular longitudinal array of microtubules, anchored basally in a centriole.	3.54	0
positive regulation of vasodilation	Any process that activates or increases the frequency, rate or extent of vasodilation.	3.52	0
caspase activation via cytochrome c	Upregulation of the activity of a caspase, any of a group of cysteine proteases involved in apoptosis, mediated by cytochrome c.	3.48	0.43
regulation of protein stability	Any process that affects the structure and integrity of a protein by altering the likelihood of its degradation or aggregation.	3.45	-0.05
positive regulation of NF-kappaB transcription factor activity	Any process that activates or increases the frequency, rate or extent of activity of the transcription factor NF-kappaB.	3.45	0
T cell differentiation in the thymus	The process whereby a precursor cell type acquires the specialized features of a T cell via a differentiation pathway dependent upon transit through the thymus.	3.44	0
negative regulation of catalytic activity	Any process that stops or reduces the activity of an enzyme.	3.42	0
inactivation of MAPK activity	Any process that terminates the activity of the active enzyme MAP kinase.	3.41	0
drug metabolic process	The chemical reactions and pathways involving a drug, a substance used in the diagnosis, treatment or prevention of a disease; as used here antibiotic substances (see antibiotic metabolism) are considered to be drugs, even if not used in medical or veterinary practice.	3.38	0.55
pro-B cell differentiation	The process whereby a precursor cell type acquires the specialized features of a pro-B cell. Pro-B cells are the earliest stage of the B cell lineage and undergo heavy chain D and J gene rearrangements, although they are not fully committed.	3.34	0
pyrimidine deoxyribonucleotide biosynthetic process	The chemical reactions and pathways resulting in the formation of a pyrimidine deoxyribonucleotide, a compound consisting of nucleoside (a pyrimidine base linked to a deoxyribose sugar) esterified with a phosphate moiety at either the 3' or 5'-hydroxyl group of its glycose moiety.	3.33	0
middle ear morphogenesis	The process by which the anatomical structures of middle ear are generated and organized. Morphogenesis pertains to the creation of form. The middle ear is the air-filled cavity within the skull of vertebrates that lies between the outer ear and the inner ear. It is linked to the pharynx (and therefore to outside air) via the Eustachian tube and in mammals contains the three ear ossicles, which t…	3.32	0
DNA damage response, signal transduction by p53 class mediator resulting in induction of apoptosis	A cascade of processes induced by the cell cycle regulator phosphoprotein p53, or an equivalent protein, in response to the detection of DNA damage and resulting in the initiation of apoptosis (programmed cell death).	3.32	0
xenobiotic metabolic process	The chemical reactions and pathways involving a xenobiotic compound, a compound foreign to living organisms. Used of chemical compounds, e.g. a xenobiotic chemical, such as a pesticide.	3.26	0.15
eye photoreceptor cell development	Development of a photoreceptor, a sensory cell in the eye that reacts to the presence of light. They usually contain a pigment that undergoes a chemical change when light is absorbed, thus stimulating a nerve.	3.25	0
defense response to virus	Reactions triggered in response to the presence of a virus that act to protect the cell or organism.	3.24	0
response to exogenous dsRNA	A change in state or activity of a cell or an organism (in terms of movement, secretion, enzyme production, gene expression, etc.) as a result of an exogenous double-stranded RNA stimulus.	3.23	-0.05
protein amino acid methylation	The addition of a methyl group to a protein amino acid. A methyl group is derived from methane by the removal of a hydrogen atom.	3.23	0
cholesterol metabolic process	The chemical reactions and pathways involving cholesterol, cholest-5-en-3 beta-ol, the principal sterol of vertebrates and the precursor of many steroids, including bile acids and steroid hormones. It is a component of the plasma membrane lipid bilayer and of plasma lipoproteins and can be found in all animal tissues.	3.21	0
single strand break repair	The repair of single strand breaks in DNA. Repair of such breaks is mediated by the same enzyme systems as are used in base excision repair.	3.19	0
glycerophospholipid biosynthetic process	The chemical reactions and pathways resulting in the formation of glycerophospholipids, any derivative of glycerophosphate that contains at least one O-acyl, O-alkyl, or O-alkenyl group attached to the glycerol residue.	3.16	0.88
regulation of cell division	Any process that modulates the frequency, rate or extent of the physical partitioning and separation of a cell into daughter cells.	3.15	0
peptidyl-arginine modification	The modification of peptidyl-arginine.	3.14	0
interleukin-13 production	The appearance of interleukin-13 due to biosynthesis or secretion following a cellular stimulus, resulting in an increase in its intracellular or extracellular levels.	3.13	0
vacuolar transport	The directed movement of substances into, out of or within a vacuole.	3.12	0
response to unfolded protein	A change in state or activity of a cell or an organism (in terms of movement, secretion, enzyme production, gene expression, etc.) as a result of an unfolded protein stimulus.	3.1	0
kidney development	The process whose specific outcome is the progression of the kidney over time, from its formation to the mature structure. The kidney is an organ that filters the blood and excretes the end products of body metabolism in the form of urine.	3.1	0
cell fate determination	Process involved in cell fate commitment. Once determination has taken place, a cell becomes committed to differentiate down a particular pathway regardless of its environment.	3.1	0
response to nutrient	A change in state or activity of a cell or an organism (in terms of movement, secretion, enzyme production, gene expression, etc.) as a result of a nutrient stimulus.	3.09	0
regulation of nitrogen compound metabolic process	Any process that modulates the frequency, rate or extent of the chemical reactions and pathways involving nitrogen or nitrogenous compounds.	3.08	0
regulation of interferon-alpha biosynthetic process	Any process that modulates the frequency, rate or extent of the chemical reactions and pathways resulting in the formation of interferon-alpha.	3.07	0
learning or memory	The acquisition and processing of information and/or the storage and retrieval of this information over time.	3.07	0
T-helper 1 type immune response	An immune response which is associated with resistance to intracellular bacteria, fungi, and protozoa, and pathological conditions such as arthritis, and which is typically orchestrated by the production of particular cytokines by T-helper 1 cells, most notably interferon-gamma, IL-2, and lymphotoxin.	3.07	0
positive regulation of interferon-beta biosynthetic process	Any process that activates or increases the frequency, rate or extent of the chemical reactions and pathways resulting in the formation of interferon-beta.	3.05	-0.06
organ morphogenesis	Morphogenesis of an organ. An organ is defined as a tissue or set of tissues that work together to perform a specific function or functions. Morphogenesis is the process by which anatomical structures are generated and organized. Organs are commonly observed as visibly distinct structures, but may also exist as loosely associated clusters of cells that work together to perform a specific function…	3.05	0
negative regulation of cellular biosynthetic process	Any process that stops, prevents or reduces the frequency, rate or extent of the chemical reactions and pathways resulting in the formation of substances, carried out by individual cells.	3.05	0
cortical actin cytoskeleton organization	A process that is carried out at the cellular level which results in the formation, arrangement of constituent parts, or disassembly of actin-based cytoskeletal structures in the cell cortex, i.e. just beneath the plasma membrane.	3.05	-0.39
cholesterol efflux	The directed movement of cholesterol, cholest-5-en-3-beta-ol, out of a cell or organelle.	3.05	0
production of molecular mediator of acute inflammatory response	The synthesis or release of any molecular mediator of the acute inflammatory response following an inflammatory stimulus, resulting in an increase in its intracellular or extracellular levels.	3.04	0.16
phototransduction	The sequence of reactions within a cell required to convert absorbed photons into a molecular signal.	3.04	0
post-embryonic development	The process whose specific outcome is the progression of the organism over time, from the completion of embryonic development to the mature structure. See embryonic development.	3.02	0
transcription termination	The process by which transcription is completed; the formation of phosphodiester bonds ceases, the RNA-DNA hybrid dissociates, and RNA polymerase releases the DNA.	3.01	-0.36
sensory perception of temperature stimulus	The series of events required for an organism to receive a sensory temperature stimulus, convert it to a molecular signal, and recognize and characterize the signal.	3	0
bone resorption	The process by which specialized cells known as osteoclasts degrade the organic and inorganic portions of bone, and endocytose and transport the degradation products.	2.99	0
triacylglycerol metabolic process	The chemical reactions and pathways involving triacylglycerol, any triester of glycerol. The three fatty acid residues may all be the same or differ in any permutation. Triacylglycerols are important components of plant oils, animal fats and animal plasma lipoproteins.	2.97	0
nucleotide-excision repair	In nucleotide excision repair a small region of the strand surrounding the damage is removed from the DNA helix as an oligonucleotide. The small gap left in the DNA helix is filled in by the sequential action of DNA polymerase and DNA ligase. Nucleotide excision repair recognizes a wide range of substrates, including damage caused by UV irradiation (pyrimidine dimers and 6-4 photoproducts) and ch…	2.96	0
positive regulation of tumor necrosis factor biosynthetic process	Any process that activates or increases the frequency, rate or extent of the chemical reactions and pathways resulting in the formation of tumor necrosis factor, an inflammatory cytokine produced by macrophages/monocytes during acute inflammation and which is responsible for a diverse range of signaling events within cells, leading to necrosis or apoptosis.	2.95	0
positive regulation of pseudopodium formation	Any process that activates or increases the frequency, rate or extent of the assembly of pseudopodia.	2.95	0
adult feeding behavior	Feeding behavior in a fully developed and mature organism.	2.95	0
protein amino acid ADP-ribosylation	The transfer, from NAD, of ADP-ribose to protein amino acids.	2.94	0
cellular catabolic process	The chemical reactions and pathways resulting in the breakdown of substances, carried out by individual cells.	2.94	0
regulation of Rab GTPase activity	Any process that modulates the activity of a GTPase of the Rab family.	2.93	0
complement activation, alternative pathway	Any process involved in the activation of any of the steps of the alternative pathway of the complement cascade which allows for the direct killing of microbes and the regulation of other immune processes.	2.93	0
cholesterol catabolic process	The chemical reactions and pathways resulting in the breakdown of cholesterol, cholest-5-en-3 beta-ol, the principal sterol of vertebrates and the precursor of many steroids, including bile acids and steroid hormones.	2.92	0
androgen metabolic process	The chemical reactions and pathways involving androgens, C19 steroid hormones that can stimulate the development of male sexual characteristics.	2.91	0
mRNA stabilization	Prevention of degradation of mRNA molecules. In the absence of compensating changes in other processes, the slowing of mRNA degradation can result in an overall increase in the population of active mRNA molecules.	2.9	0
biogenic amine catabolic process	The chemical reactions and pathways resulting in the breakdown of biogenic amines, any of a group of naturally occurring, biologically active amines, such as norepinephrine, histamine, and serotonin, many of which act as neurotransmitters.	2.9	0
ribosome biogenesis	The process of the formation of the constituents of the ribosome subunits, their assembly, and their transport to the sites of protein synthesis.	2.89	0
estrogen receptor signaling pathway	Any series of molecular signals generated as a consequence of an estrogen binding to its receptor.	2.89	0
regulation of the force of heart contraction	Any process that modulates the extent of heart contraction, changing the force with which blood is propelled.	2.88	0
Wnt receptor signaling pathway, calcium modulating pathway	The series of molecular signals initiated by binding of a Wnt protein to a receptor on the surface of the target cell where activated receptors leads to an increase in intracellular calcium and activation of protein kinase C (PKC).	2.88	0
protein folding	The process of assisting in the covalent and noncovalent assembly of single chain polypeptides or multisubunit complexes into the correct tertiary structure.	2.87	0
potassium ion transport	The directed movement of potassium ions (K+) into, out of, within or between cells.	2.85	0
phospholipid efflux	The directed movement of a phospholipid out of a cell or organelle.	2.85	0
defense response	Reactions, triggered in response to the presence of a foreign body or the occurrence of an injury, which result in restriction of damage to the organism attacked or prevention/recovery from the infection caused by the attack.	2.85	0
positive regulation of hydrolase activity	Any process that activates or increases the frequency, rate or extent of hydrolase activity, the catalysis of the hydrolysis of various bonds.	2.84	0
lipid catabolic process	The chemical reactions and pathways resulting in the breakdown of lipids, compounds soluble in an organic solvent but not, or sparingly, in an aqueous solvent.	2.84	0
smooth muscle development	The process whose specific outcome is the progression of smooth muscle over time, from its formation to the mature structure.	2.83	-0.29
regulation of neurotransmitter secretion	Any process that modulates the frequency, rate or extent of the regulated release of a neurotransmitter from a cell or group of cells.	2.83	0
positive regulation of cAMP biosynthetic process	Any process that activates or increases the frequency, rate or extent of the chemical reactions and pathways resulting in the formation of the nucleotide cAMP (cyclic AMP, adenosine 3',5'-cyclophosphate).	2.83	-0.56
blood coagulation, extrinsic pathway	A pathway of blood coagulation in which the earlier stages of the cascade are bypassed and the activation of factor X to factor Xa is effected by the combination of factor VIIa + thromboplastin; this second pathway occurs when tissue extracts are present in optimal amounts and is much more rapid than the intrinsic pathway.	2.83	0
camera-type eye development	The process whose specific outcome is the progression of the camera-type eye over time, from its formation to the mature structure. The camera-type eye is an organ of sight that receives light through an aperture and focuses it through a lens, projecting it on a photoreceptor field.	2.82	0
regulation of muscle contraction	Any process that modulates the frequency, rate or extent of muscle contraction.	2.81	0
positive regulation of I-kappaB kinase/NF-kappaB cascade	Any process that activates or increases the frequency, rate or extent of an I-kappaB kinase/NF-kappaB induced cascade.	2.81	0
myoblast differentiation	The process whereby a relatively unspecialized cell acquires specialized features of a myoblast. A myoblast is a mononucleate cell type that, by fusion with other myoblasts, gives rise to the myotubes that eventually develop into skeletal muscle fibers.	2.81	0
embryonic cleavage	The first few specialized divisions of an activated animal egg.	2.81	0
carboxylic acid catabolic process	The chemical reactions and pathways resulting in the breakdown of carboxylic acids, any organic acid containing one or more carboxyl (-COOH) groups.	2.81	0
water homeostasis	Any process involved in the maintenance of an internal equilibrium of water within an organism or cell.	2.8	0
S phase of mitotic cell cycle	Progression through S phase, the part of the mitotic cell cycle during which DNA synthesis takes place.	2.8	0
DNA catabolic process	The chemical reactions and pathways resulting in the breakdown of DNA, deoxyribonucleic acid, one of the two main types of nucleic acid, consisting of a long unbranched macromolecule formed from one or two strands of linked deoxyribonucleotides, the 3'-phosphate group of each constituent deoxyribonucleotide being joined in 3',5'-phosphodiester linkage to the 5'-hydroxyl group of the deoxyribose m…	2.8	0
positive regulation of DNA binding	Any process that activates or increases the frequency, rate or extent of DNA binding, selective interaction with deoxyribonucleic acid.	2.79	0
actin filament bundle formation	The assembly of actin filament bundles; actin filaments are on the same axis but may be oriented with the same or opposite polarities and may be packed with different levels of tightness.	2.79	0
response to toxin	A change in state or activity of a cell or an organism (in terms of movement, secretion, enzyme production, gene expression, etc.) as a result of a toxin stimulus.	2.78	0
regulation of multicellular organismal process	Any process that modulates the frequency, rate or extent of a multicellular organismal process, the processes pertinent to the function of a multicellular organism above the cellular level; includes the integrated processes of tissues and organs.	2.78	0.91
righting reflex	A reflex process in which an animal immediately tries to turn over after being placed in a supine position.	2.77	0
sensory perception	The series of events required for an organism to receive a sensory stimulus, convert it to a molecular signal, and recognize and characterize the signal.	2.76	0
L-glutamate transport	The directed movement of L-glutamate, the L enantiomer anion of 2-aminopentanedioic acid, into, out of, within or between cells.	2.76	0
vasoconstriction	A decrease in the diameter of blood vessels, especially arteries, usually causing an increase in blood pressure.	2.73	-0.57
long-chain fatty acid transport	The directed movement of long-chain fatty acids into, out of, within or between cells. A long-chain fatty acid is an aliphatic compound with a terminal carboxyl group and with a chain length greater than C12.	2.73	0
positive regulation of blood coagulation	Any process that activates or increases the frequency, rate or extent of blood coagulation.	2.72	0.38
negative regulation of cyclin-dependent protein kinase activity	Any process that stops, prevents or reduces the frequency, rate or extent of CDK activity.	2.71	0
fibrinolysis	An ongoing process that solubilizes fibrin, chiefly by the proteolytic action of plasmin, resulting in the removal of small blood clots.	2.71	0
phospholipid metabolic process	The chemical reactions and pathways involving phospholipids, any lipid containing phosphoric acid as a mono- or diester.	2.67	0
regulation of response to biotic stimulus	Any process that modulates the frequency, rate, or extent of a response to biotic stimulus.	2.65	0
Notch signaling pathway	The series of molecular signals initiated by binding of an extracellular ligand to a Notch receptor on the surface of the target cell.	2.65	0
lysosome organization	A process that is carried out at the cellular level which results in the formation, arrangement of constituent parts, or disassembly of a lysosome. A lysosome is a cytoplasmic, membrane-bounded organelle that is found in most animal cells and that contains a variety of hydrolases.	2.64	0
negative regulation of neuron differentiation	Any process that stops, prevents or reduces the frequency, rate or extent of neuron differentiation.	2.62	0
organelle fission	The creation of two or more organelles by division of one organelle.	2.61	0
spermine metabolic process	The chemical reactions and pathways involving spermine, a polybasic amine found in human sperm, in ribosomes and in some viruses, which is involved in nucleic acid packaging. Synthesis is regulated by ornithine decarboxylase which plays a key role in control of DNA replication.	2.6	0
dorsal/ventral pattern formation	The regionalization process by which the areas along the dorsal/ventral axis are established that will lead to differences in cell differentiation. The dorsal/ventral axis is defined by a line that runs orthogonal to both the anterior/posterior and left/right axes. The dorsal end is defined by the upper or back side of an organism. The ventral end is defined by the lower or front side of an organ…	2.6	0
androgen receptor signaling pathway	Any series of molecular signals generated as a consequence of an androgen binding to its receptor.	2.6	0
detection of mechanical stimulus involved in sensory perception of pain	The series of events involved in the perception of pain in which a sensory mechanical stimulus is received by a cell and converted into a molecular signal.	2.59	0
sex determination	Any process that establishes and transmits the specification of sexual status of an individual organism.	2.58	0
platelet activation	A series of progressive, overlapping events triggered by exposure of the platelets to subendothelial tissue. These events include shape change, adhesiveness, aggregation, and release reactions. When carried through to completion, these events lead to the formation of a stable hemostatic plug.	2.58	0
G-protein signaling, adenylate cyclase activating pathway	The series of molecular signals generated as a consequence of a G-protein coupled receptor binding to its physiological ligand, followed by activation of adenylyl cyclase and a subsequent increase in the concentration of cyclic AMP.	2.58	0
transcription initiation from RNA polymerase II promoter	Any process involved in starting transcription from the RNA polymerase II promoter.	2.57	0
spliceosome assembly	The aggregation, arrangement and bonding together of the spliceosome, a ribonucleoprotein apparatus that catalyzes nuclear mRNA splicing via transesterification reactions.	2.56	0
protein amino acid N-linked glycosylation via asparagine	The posttranslational glycosylation of protein via the N4 atom of peptidyl-asparagine forming N4-glycosyl-L-asparagine; the most common form is N-acetylglucosaminyl asparagine; N-acetylgalactosaminyl asparagine also occurs; this modification typically occurs in extracellular peptides with an N-X-(ST) motif. Partial modification has been observed to occur with cysteine, rather than serine or threo…	2.56	0
hyperosmotic response	A change in state or activity of a cell or an organism or cell (in terms of movement, secretion, enzyme production, gene expression, etc.) as a result of detection of, or exposure to, a hyperosmotic environment, i.e. an environment with a higher concentration of solutes than the organism or cell.	2.56	0
cell surface receptor linked signal transduction	Any series of molecular signals initiated by the binding of an extracellular ligand to a receptor on the surface of the target cell.	2.56	0
retroviral genome replication	Any process involved in the replication of a retroviral genome. Retroviruses use RNA as their nucleic acid and reverse transcriptase to copy their genome into the DNA of the host cells chromosomes.	2.55	0
learning	Any process in an organism in which a relatively long-lasting adaptive behavioral change occurs as the result of experience.	2.55	0
detection of bacterium	The series of events in which a stimulus from a bacterium is received and converted into a molecular signal.	2.55	0
cellular zinc ion homeostasis	The regulation of the levels, transport, and metabolism of zinc ions within a cell or between a cell and its external environment.	2.54	0.06
negative regulation of osteoblast differentiation	Any process that stops, prevents or reduces the frequency, rate or extent of osteoblast differentiation.	2.53	0
viral reproduction	The process by which a virus reproduces. Usually, this is by infection of a host cell, replication of the viral genome, and assembly of progeny virus particles. In some cases the viral genetic material may integrate into the host genome and only subsequently, under particular circumstances, 'complete' its life cycle.	2.52	0
sensory perception of sound	The series of events required for an organism to receive an auditory stimulus, convert it to a molecular signal, and recognize and characterize the signal. Sonic stimuli are detected in the form of vibrations and are processed to form a sound.	2.52	0
nucleus organization	A process that is carried out at the cellular level which results in the formation, arrangement of constituent parts, or disassembly of the nucleus.	2.52	0
iron-sulfur cluster assembly	The incorporation of iron and exogenous sulfur into a metallo-sulfur cluster.	2.52	0
DNA damage checkpoint	A signal transduction pathway, induced by DNA damage, that blocks cell cycle progression (in G1, G2 or metaphase) or slows the rate at which S phase proceeds.	2.52	0
steroid biosynthetic process	The chemical reactions and pathways resulting in the formation of steroids, compounds with a 1,2,cyclopentanoperhydrophenanthrene nucleus; includes de novo formation and steroid interconversion by modification.	2.5	0
hexose biosynthetic process	The chemical reactions and pathways resulting in the formation of hexose, any monosaccharide with a chain of six carbon atoms in the molecule.	2.5	-0.76
regulation of gene expression, epigenetic	Any process that modulates the frequency, rate or extent of gene expression; the process is mitotically or meiotically heritable, or is stably self-propagated in the cytoplasm of a resting cell, and does not entail a change in DNA sequence.	2.49	0
mechanoreceptor differentiation	The process whereby a relatively unspecialized cell acquires specialized features of a mechanoreceptor, a cell specialized to transduce mechanical stimuli and relay that information centrally in the nervous system.	2.49	0
chromatin silencing	Repression of transcription by altering the structure of chromatin, e.g. by conversion of large regions of DNA into an inaccessible state often called heterochromatin.	2.49	0
sperm motility	Any process involved in the controlled movement of a sperm cell.	2.48	0
positive regulation of epithelial cell proliferation	Any process that activates or increases the rate or extent of epithelial cell proliferation.	2.48	0
maintenance of protein location in nucleus	Any process by which a protein is maintained in the nucleus and prevented from moving elsewhere. These include sequestration within the nucleus, protein stabilization to prevent transport elsewhere and the active retrieval of proteins that escape the nucleus.	2.48	-0.07
RNA processing	Any process involved in the conversion of one or more primary RNA transcripts into one or more mature RNA molecules.	2.48	0
Golgi organization	A process that is carried out at the cellular level which results in the formation, arrangement of constituent parts, or disassembly of the Golgi apparatus.	2.48	0
regulation of response to external stimulus	Any process that modulates the frequency, rate or extent of a response to an external stimulus.	2.47	0
neural tube closure	The last step in the formation of the neural tube, where the paired neural folds are brought together and fuse at the dorsal midline.	2.47	0
detection of biotic stimulus	The series of events in which a biotic stimulus, one caused or produced by a living organism, is received and converted into a molecular signal.	2.47	0
activation of transmembrane receptor protein tyrosine kinase activity	Any process that initiates the activity of the inactive transmembrane receptor protein tyrosine kinase activity.	2.47	0.34
axoneme assembly	The assembly and organization of an axoneme, the bundle of microtubules and associated proteins that forms the core of cilia and flagella in eukaryotic cells and is responsible for their movements.	2.45	0
viral genome replication	Any process involved directly in viral genome replication, including viral nucleotide metabolism.	2.44	0
striated muscle contraction	A process whereby force is generated within striated muscle tissue, resulting in a change in muscle geometry. Force generation involves a chemo-mechanical energy conversion step. The chemo-mechanical energy conversion step is carried out by the actin/myosin complex activity, which generates force through ATP hydrolysis. Striated muscle is a type of muscle in which the repeating units (sarcomeres)…	2.44	0
negative regulation of transcription from RNA polymerase II promoter	Any process that stops, prevents or reduces the frequency, rate or extent of transcription from an RNA polymerase II promoter.	2.44	0
negative regulation of DNA replication	Any process that stops, prevents or reduces the frequency, rate or extent of DNA replication.	2.44	0
regulation of nucleotide metabolic process	Any process that modulates the frequency, rate or extent of the chemical reactions and pathways involving nucleotides.	2.43	0
regulation of fat cell differentiation	Any process that modulates the frequency, rate or extent of adipocyte differentiation.	2.43	0
nuclear mRNA splicing, via spliceosome	The joining together of exons from one or more primary transcripts of nuclear messenger RNA (mRNA) and the excision of intron sequences, via a spliceosomal mechanism, so that mRNA consisting only of the joined exons is produced.	2.43	0
negative regulation of inflammatory response	Any process that stops, prevents or reduces the frequency, rate or extent of the inflammatory response.	2.43	0
regulation of immune response	Any process that modulates the frequency, rate or extent of the immune response, the immunological reaction of an organism to an immunogenic stimulus.	2.42	0
protein maturation via proteolysis	The hydrolysis of a peptide bond or bonds within a protein during protein maturation, the process leading to the attainment of the full functional capacity of a protein.	2.42	0
cytoplasm organization	A process that is carried out at the cellular level which results in the formation, arrangement of constituent parts, or disassembly of the cytoplasm. The cytoplasm is all of the contents of a cell excluding the plasma membrane and nucleus, but including other subcellular structures.	2.42	0
muscle thin filament assembly	Formation of the actin-based thin filaments of myofibrils.	2.4	0
caspase activation	Upregulation of the activity of a caspase, any of a group of cysteine proteases involved in apoptosis.	2.39	0
positive regulation of transcription from RNA polymerase II promoter	Any process that activates or increases the frequency, rate or extent of transcription from the RNA polymerase II promoter.	2.38	0
decidualization	The cellular and vascular changes occurring in the endometrium of the pregnant uterus just after the onset of blastocyst implantation. This process involves the proliferation and differentiation of the fibroblast-like endometrial stromal cells into large, polyploid decidual cells that eventually form the maternal component of the placenta.	2.38	0
negative regulation of osteoclast differentiation	Any process that stops, prevents or reduces the frequency, rate or extent of osteoclast differentiation.	2.37	0
detection of chemical stimulus involved in sensory perception	The series of events in which a sensory chemical stimulus is received by a cell and converted into a molecular signal.	2.37	0
arachidonic acid secretion	The regulated release of arachidonic acid from a cell or group of cells.	2.37	0
skeletal system morphogenesis	The process by which the anatomical structures of the skeleton are generated and organized. Morphogenesis pertains to the creation of form.	2.36	-0.12
pseudouridine synthesis	The intramolecular conversion of uridine to pseudouridine within an RNA molecule. This posttranscriptional base modification occurs in tRNA, rRNA, and snRNAs.	2.36	0
negative regulation of neuroblast proliferation	Any process that stops, prevents or reduces the frequency, rate or extent of the proliferation of neuroblasts.	2.36	0
macrophage chemotaxis	The movement of a macrophage in response to an external stimulus.	2.36	0
notochord development	The process whose specific outcome is the progression of the notochord over time, from its formation to the mature structure. The notochord is a mesoderm-derived structure located ventral of the developing nerve cord. In vertebrates, the notochord serves as a core around which other mesodermal cells form the vertebrae. In the most primitive chordates, which lack vertebrae, the notochord persists …	2.35	0
cell morphogenesis	The developmental process by which the size or shape of a cell is generated and organized. Morphogenesis pertains to the creation of form.	2.35	0
rRNA modification	The covalent alteration of one or more nucleotides within an rRNA molecule to produce an rRNA molecule with a sequence that differs from that coded genetically.	2.34	0
positive regulation of protein catabolic process	Any process that activates or increases the frequency, rate or extent of the chemical reactions and pathways resulting in the breakdown of a protein by the destruction of the native, active configuration, with or without the hydrolysis of peptide bonds.	2.34	0
lens development in camera-type eye	The process whose specific outcome is the progression of the lens over time, from its formation to the mature structure. The lens is a transparent structure in the eye through which light is focused onto the retina.	2.34	0
inflammatory response	The immediate defensive reaction (by vertebrate tissue) to infection or injury caused by chemical or physical agents. The process is characterized by local vasodilation, extravasation of plasma into intercellular spaces and accumulation of white blood cells and macrophages.	2.33	0
chemotaxis	The directed movement of a motile cell or organism, or the directed growth of a cell guided by a specific chemical concentration gradient. Movement may be towards a higher concentration (positive chemotaxis) or towards a lower concentration (negative chemotaxis).	2.33	0
nucleotide metabolic process	The chemical reactions and pathways involving a nucleotide, a nucleoside that is esterified with (ortho)phosphate or an oligophosphate at any hydroxyl group on the glycose moiety; may be mono-, di- or triphosphate; this definition includes cyclic nucleotides (nucleoside cyclic phosphates).	2.32	0
behavioral response to pain	A change in the behavior of an organism as a result of a pain stimulus. Pain stimuli cause activation of nociceptors, peripheral receptors for pain, include receptors which are sensitive to painful mechanical stimuli, extreme heat or cold, and chemical stimuli.	2.32	0
regulation of RNA metabolic process	Any process that modulates the frequency, rate or extent of the chemical reactions and pathways involving RNA.	2.31	0
neuropeptide signaling pathway	The series of molecular signals generated as a consequence of a peptide neurotransmitter binding to a cell surface receptor.	2.31	0
induction of apoptosis via death domain receptors		2.31	0
DNA methylation	The covalent transfer of a methyl group to either N-6 of adenine or C-5 or N-4 of cytosine.	2.31	0
skeletal muscle regeneration	The regrowth of muscle tissue to repair injured or damaged muscle fibers in the postnatal stage.	2.3	0
positive regulation of interleukin-6 biosynthetic process	Any process that activates or increases the frequency, rate or extent of the chemical reactions and pathways resulting in the formation of interleukin-6.	2.3	0
maintenance of location in cell	Any process by which a substance or cellular entity, such as a protein complex or organelle, is maintained in a specific location within, or in the membrane of, a cell, and is prevented from moving elsewhere.	2.3	0
heterophilic cell adhesion	The attachment of an adhesion molecule in one cell to a nonidentical adhesion molecule in an adjacent cell.	2.3	-0.15
T cell lineage commitment	The process by which a lymphoid progenitor cell becomes committed to becoming any type of T cell.	2.3	0
bile acid biosynthetic process	The chemical reactions and pathways resulting in the formation of bile acids, any of a group of steroid carboxylic acids occurring in bile.	2.29	0
DNA damage response, signal transduction by p53 class mediator resulting in cell cycle arrest	A cascade of processes induced by the cell cycle regulator phosphoprotein p53, or an equivalent protein, in response to the detection of DNA damage and resulting in the stopping or reduction in rate of the cell cycle.	2.29	0
somatic stem cell maintenance	The process by which an organism retains a population of somatic stem cells, undifferentiated cells in the embryo or adult which can undergo unlimited division and give rise to cell types of the body other than those of the germ-line.	2.28	0
respiratory chain complex IV assembly	The aggregation, arrangement and bonding together of a set of components to form respiratory chain complex IV (also known as cytochrome c oxidase), the terminal member of the respiratory chain of the mitochondrion and some aerobic bacteria. Cytochrome c oxidases are multi-subunit enzymes containing from 13 subunits in the mammalian mitochondrial form to 3-4 subunits in the bacterial forms.	2.28	0
interferon-gamma production	The appearance of interferon-gamma due to biosynthesis or secretion following a cellular stimulus, resulting in an increase in its intracellular or extracellular levels. Interferon-gamma is also known as type II interferon.	2.28	0
hormone-mediated signaling	A series of molecular signals mediated by the detection of a hormone.	2.28	0
ribosomal protein import into nucleus	The directed movement of a ribosomal protein from the cytoplasm into the nucleus, across the nuclear membrane.	2.27	0
regulation of sodium ion transport	Any process that modulates the frequency, rate or extent of the directed movement of sodium ions (Na+) into, out of, within or between cells.	2.27	0
regulation of heart contraction	Any process that modulates the frequency, rate or extent of heart contraction. Heart contraction is the process by which the heart decreases in volume in a characteristic way to propel blood through the body.	2.27	0
chromatin modification	The alteration of DNA or protein in chromatin, which may result in changing the chromatin structure.	2.27	0
response to amphetamine	A change in state or activity of a cell or an organism (in terms of movement, secretion, enzyme production, gene expression, etc.) as a result of an amphetamine stimulus. Amphetamines consist of a group of compounds related to alpha-methylphenethylamine.	2.26	0.75
pentose-phosphate shunt	The process by which glucose is oxidized, coupled to NADPH synthesis. Glucose 6-P is oxidized with the formation of carbon dioxide (CO2), ribulose 5-phosphate and reduced NADP; ribulose 5-P then enters a series of reactions interconverting sugar phosphates. The pentose phosphate pathway is a major source of reducing equivalents for biosynthesis reactions and is also important for the conversion o…	2.26	0
embryonic hemopoiesis	The stages of blood cell formation that take place within the embryo.	2.26	0
defense response to Gram-positive bacterium	Reactions triggered in response to the presence of a Gram-positive bacterium that act to protect the cell or organism.	2.26	0
response to stimulus	A change in state or activity of a cell or an organism (in terms of movement, secretion, enzyme production, gene expression, etc.) as a result of a stimulus.	2.25	0
mitochondrial respiratory chain complex I assembly	The aggregation, arrangement and bonding together of a set of components to form mitochondrial respiratory chain complex I.	2.25	0.06
positive regulation of cell adhesion	Any process that activates or increases the frequency, rate or extent of cell adhesion.	2.24	0.32
peroxisome organization	A process that is carried out at the cellular level which results in the formation, arrangement of constituent parts, or disassembly of a peroxisome. A peroxisome is a small, membrane-bounded organelle that uses dioxygen (O2) to oxidize organic molecules.	2.24	0
activation of phospholipase C activity	The initiation of the activity of the inactive enzyme phospolipase C as the result of a series of molecular signals generated as a consequence of a G-protein coupled receptor binding to its physiological ligand.	2.24	0
mesodermal cell fate commitment	The process by which a cell becomes committed to become part of the mesoderm.	0	2.68
regulation of cholesterol biosynthetic process	Any process that modulates the frequency, rate or extent of the chemical reactions and pathways resulting in the formation of cholesterol.	-2.24	0
receptor clustering	Grouping of a set of receptors at a cellular location, often to amplify the sensitivity of a signaling response.	-2.24	0.64
pattern specification process	Any developmental process that results in the creation of defined areas or spaces within an organism to which cells respond and eventually are instructed to differentiate.	-2.25	0
I-kappaB kinase/NF-kappaB cascade	A series of reactions initiated by the activation of the transcription factor NF-kappaB. NF-kappaB is sequestered by the inhibitor I-kappaB, and is released when I-kappaB is phosphorylated by activated I-kappaB kinase.	-2.25	0
protein deubiquitination	The removal of one or more ubiquitin moieties from a protein.	-2.26	0
positive regulation of muscle cell differentiation	Any process that activates or increases the frequency, rate or extent of muscle cell differentiation.	-2.26	0
histone ubiquitination	The modification of histones by addition of ubiquitin groups.	-2.26	0
regulation of growth	Any process that modulates the frequency, rate or extent of the growth of all or part of an organism so that it occurs at its proper speed, either globally or in a specific part of the organism's development.	-2.27	0
pancreas development	The process whose specific outcome is the progression of the pancreas over time, from its formation to the mature structure. The pancreas is an endoderm derived structure that produces precursors of digestive enzymes and blood glucose regulating enzymes.	-2.27	0
translational elongation	The successive addition of amino acid residues to a nascent polypeptide chain during protein biosynthesis.	-2.28	0
organelle localization	Any process by which an organelle is transported to, and/or maintained in, a specific location.	-2.28	0
negative regulation of apoptosis	Any process that stops, prevents or reduces the frequency, rate or extent of cell death by apoptosis.	-2.28	0
dendrite development	The process whose specific outcome is the progression of the dendrite over time, from its formation to the mature structure. A dendrite is a freely branching protoplasmic process of a nerve cell.	-2.28	0
response to acid	A change in state or activity of a cell or an organism (in terms of movement, secretion, enzyme production, gene expression, etc.) as a result of an acid stimulus.	-2.29	0
regulation of melanocyte differentiation	Any process that modulates the frequency, rate or extent of melanocyte differentiation.	-2.29	0
exocrine system development	Progression of the exocrine system over time, from its formation to a mature structure. The exocrine system is a system of hormones and glands, where the glands secrete straight to a target site via ducts or tubes. The human exocrine system includes the salivary glands, sweat glands and many glands of the digestive system.	-2.29	0
cell motion	Any process involved in the controlled movement of a cell.	-2.29	0
regulation of defense response to virus by virus	Any viral process that modulates the frequency, rate, or extent of the antiviral response of the host cell or organism.	-2.31	0
positive regulation of cytokine production	Any process that activates or increases the frequency, rate or extent of production of a cytokine.	-2.31	0
membrane budding	The evagination of a membrane, resulting in formation of a vesicle.	-2.31	0
dicarboxylic acid metabolic process	The chemical reactions and pathways involving dicarboxylic acids, any organic acid containing two carboxyl (COOH) groups or anions (COO-).	-2.31	1.13
cellular iron ion homeostasis	The regulation of the levels, transport, and metabolism of iron ions within a cell or between a cell and its external environment.	-2.31	0
cardiac muscle cell differentiation	The process whereby a relatively unspecialized cell acquires specialized features of a cardiac muscle cell. Cardiac muscle cells are striated muscle cells that are responsible for heart contraction.	-2.31	-0.32
peptide transport	The directed movement of peptides, compounds of two or more amino acids where the alpha carboxyl group of one is bound to the alpha amino group of another, into, out of, within or between cells.	-2.32	0
negative regulation of heart contraction	Any process that stops, prevents or reduces the frequency, rate or extent of heart contraction.	-2.32	0
cellular biosynthetic process	The chemical reactions and pathways resulting in the formation of substances, carried out by individual cells.	-2.32	0
actin cytoskeleton reorganization	A process that is carried out at the cellular level which results in dynamic structural changes to the arrangement of constituent parts of cytoskeletal structures comprising actin filaments and their associated proteins.	-2.32	0
regulation of cytokine biosynthetic process	Any process that modulates the frequency, rate or extent of the chemical reactions and pathways resulting in the formation of cytokines.	-2.33	0
regulation of cell migration	Any process that modulates the frequency, rate or extent of cell migration.	-2.33	0
mitochondrial fusion	Merging of two or more mitochondria within a cell to form a single compartment.	-2.33	0
intracellular transport	The directed movement of substances within a cell.	-2.33	0.31
Rho protein signal transduction	A series of molecular signals within the cell that are mediated by a member of the Rho family of proteins switching to a GTP-bound active state.	-2.33	0
ventricular cardiac muscle morphogenesis	The process by which the anatomical structures of cardiac ventricle muscle is generated and organized. Morphogenesis pertains to the creation of form.	-2.34	0
positive regulation of Wnt receptor signaling pathway	Any process that activates or increases the frequency, rate or extent of Wnt receptor signaling pathway activity.	-2.34	0
odontogenesis of dentine-containing tooth	The process whose specific outcome is the progression of a dentine-containing tooth over time, from its formation to the mature structure. A dentine-containing tooth is a hard, bony organ borne on the jaw or other bone of a vertebrate, and are composed mainly of dentine, a dense calcified substance, covered by a layer of enamel.	-2.34	0
negative regulation of ion transport	Any process that stops, prevents or reduces the frequency, rate or extent of the directed movement of charged atoms or small charged molecules into, out of, within or between cells.	-2.34	-0.8
enzyme linked receptor protein signaling pathway	Any series of molecular signals initiated by the binding of an extracellular ligand to a receptor on the surface of the target cell, where the receptor possesses catalytic activity or is closely associated with an enzyme such as a protein kinase.	-2.34	0
pyrimidine base metabolic process	The chemical reactions and pathways involving pyrimidine bases, 1,3-diazine, organic nitrogenous bases.	-2.35	0
mitosis	Progression through mitosis, the division of the eukaryotic cell nucleus to produce two daughter nuclei that, usually, contain the identical chromosome complement to their mother.	-2.35	0
establishment of cell polarity	The specification and formation of anisotropic intracellular organization or cell growth patterns.	-2.35	0
dopamine metabolic process	The chemical reactions and pathways involving dopamine, a catecholamine neurotransmitter and a metabolic precursor of noradrenaline and adrenaline.	-2.35	0
spermatogenesis	The process of formation of spermatozoa, including spermatocytogenesis and spermiogenesis.	-2.36	0
regulation of lipid catabolic process	Any process that modulates the frequency, rate, or extent of the chemical reactions and pathways resulting in the breakdown of lipids.	-2.36	-1.34
regulation of interleukin-12 production	Any process that modulates the frequency, rate, or extent of interleukin-12 production.	-2.36	0
regulation of T cell differentiation in the thymus	Any process that modulates the frequency, rate or extent of T cell differentiation in the thymus.	-2.36	0
protein ubiquitination	The process by which one or more ubiquitin moieties are added to a protein.	-2.36	0
neurotransmitter transport	The directed movement of a neurotransmitter into, out of, within or between cells. Neurotransmitters are any chemical substance that is capable of transmitting (or inhibiting the transmission of) a nerve impulse from a neuron to another cell.	-2.36	0
hemoglobin metabolic process	The chemical reactions and pathways involving hemoglobin, including its uptake and utilization.	-2.36	0
ER overload response	The series of molecular signals generated by the accumulation of normal or misfolded proteins in the endoplasmic reticulum and leading to activation of transcription by NF-kappaB.	-2.36	0
proteasomal ubiquitin-dependent protein catabolic process	The chemical reactions and pathways resulting in the breakdown of a protein or peptide by hydrolysis of its peptide bonds, initiated by the covalent attachment of ubiquitin, and mediated by the proteasome.	-2.37	0
oxygen and reactive oxygen species metabolic process	The chemical reactions and pathways involving dioxygen (O2), or any of the reactive oxygen species, e.g. superoxide anions (O2-), hydrogen peroxide (H2O2), and hydroxyl radicals (-OH).	-2.37	0
organ regeneration	The regrowth of a lost or destroyed organ.	-2.37	0
cell fate specification	The process involved in the specification of cell identity. Once specification has taken place, a cell will be committed to differentiate down a specific pathway if left in its normal environment.	-2.37	0
negative regulation of RNA metabolic process	Any process that stops, prevents or reduces the frequency, rate or extent of the chemical reactions and pathways involving RNA.	-2.38	0
regulation of signal transduction	Any process that modulates the frequency, rate or extent of signal transduction.	-2.39	0
polyamine biosynthetic process	The chemical reactions and pathways resulting in the formation of polyamines, any organic compound containing two or more amino groups.	-2.39	0
cell aging	Progression of the cell from its inception to the end of its lifespan.	-2.39	0
acrosome reaction	The discharge, by sperm, of a single, anterior secretory granule following their attachment to the zona pellucida surrounding the oocyte. The process begins with the fusion of the outer acrosomal membrane with the sperm plasma membrane and ends with the disperasl of the acrosomal contents into the egg.	-2.39	0
peptide cross-linking via chondroitin 4-sulfate glycosaminoglycan	The formation of a cross-link between peptide chains mediated by a chondroitin 4-sulfate glycosaminoglycan that originates from a typical O-glycosidic link to serine of one chain; the other chain is esterified, via the alpha-carbon of its C-terminal Asp, to C-6 of an internal N-acetylgalactosamine of the glycosaminoglycan chain.	-2.4	0
thyroid gland development	The process whose specific outcome is the progression of the thyroid gland over time, from its formation to the mature structure. The thyroid gland is an endoderm-derived gland that produces thyroid hormone.	-2.41	0
skeletal muscle development	The developmental sequence of events leading to the formation of adult muscle that occurs in the anima. In vertebrate skeletal muscle the main events are	-2.41	0
fructose metabolic process	The chemical reactions and pathways involving fructose, the ketohexose arabino-2-hexulose. Fructose exists in a open chain form or as a ring compound. D-fructose is the sweetest of the sugars and is found free in a large number of fruits and honey.	-2.41	0
anatomical structure morphogenesis	The process by which anatomical structures are generated and organized. Morphogenesis pertains to the creation of form.	-2.41	0
regulation of striated muscle contraction	Any process that modulates the frequency, rate or extent of striated muscle contraction.	-2.42	0
regulation of ARF protein signal transduction	Any process that modulates the frequency, rate or extent of ARF protein signal transduction.	-2.42	-0.24
meiosis I	Progression through the first phase of meiosis, in which cells divide and homologous chromosomes are paired and segregated from each other, producing two daughter cells.	-2.43	0
regulation of synaptic plasticity	A process that modulates synaptic plasticity, the ability of synapses to change as circumstances require. They may alter function, such as increasing or decreasing their sensitivity, or they may increase or decrease in actual numbers.	-2.44	0
protein amino acid dephosphorylation	The process of removing one or more phosphoric residues from a protein.	-2.45	0
response to wounding	A change in state or activity of a cell or an organism (in terms of movement, secretion, enzyme production, gene expression, etc.) as a result of a stimulus indicating damage to the organism.	-2.46	0
regulation of cell motion	Any process that modulates the frequency, rate or extent of the movement of a cell.	-2.47	0
regulation of retinal cell programmed cell death	Any process that modulates the frequency, rate or extent of programmed cell death that occurs in the retina.	-2.48	0
chondrocyte development	The process whose specific outcome is the progression of a chondrocyte over time, from its commitment to its mature state. Chondrocyte development does not include the steps involved in committing a chondroblast to a chondrocyte fate.	-2.48	0
blood coagulation	The sequential process by which the multiple coagulation factors of the blood interact, ultimately resulting in the formation of an insoluble fibrin clot; it may be divided into three stages	-2.48	0
ribosomal small subunit biogenesis	The formation of the constituents of the small ribosomal subunit, their assembly, and their transport to the sites of protein synthesis.	-2.49	0
protein homotetramerization	The formation of a protein homotetramer, a macromolecular structure consisting of four noncovalently associated identical subunits.	-2.49	0
glutamine family amino acid biosynthetic process	The chemical reactions and pathways resulting in the formation of amino acids of the glutamine family, comprising arginine, glutamate, glutamine and proline.	-2.49	0
developmental growth	The increase in size or mass of an entire organism, a part of an organism or a cell, where the increase in size or mass has the specific outcome of the progression of the organism over time from one condition to another.	-2.49	0
thymus development	The process whose specific outcome is the progression of the thymus over time, from its formation to the mature structure. The thymus is a symmetric bi-lobed organ involved primarily in the differentiation of immature to mature T cells, with unique vascular, nervous, epithelial, and lymphoid cell components.	-2.5	0
negative regulation of muscle contraction	Any process that stops, prevents or reduces the frequency, rate or extent of muscle contraction.	-2.51	0
axonal fasciculation	The collection of axons into a bundle of rods, known as a fascicle.	-2.51	0
phospholipid biosynthetic process	The chemical reactions and pathways resulting in the formation of phospholipids, any lipid containing phosphoric acid as a mono- or diester.	-2.52	0
apoptotic nuclear changes	The morphological and physiological alterations undergone by the nucleus during apoptosis.	-2.52	-0.1
female gamete generation	Generation of the female gamete; specialised haploid cells produced by meiosis and along with a male gamete takes part in sexual reproduction.	-2.53	0
establishment of spindle localization	The directed movement of the spindle to a specific location in the cell.	-2.53	0
polyol biosynthetic process	The chemical reactions and pathways resulting in the formation of a polyol, any alcohol containing three or more hydroxyl groups attached to saturated carbon atoms.	-2.54	0.37
nucleosome assembly	The aggregation, arrangement and bonding together of a nucleosome, the beadlike structural units of eukaryotic chromatin composed of histones and DNA.	-2.54	0
T cell proliferation	The expansion of a T cell population by cell division. Follows T cell activation.	-2.54	0
smooth muscle cell differentiation	The process whereby a relatively unspecialized cell acquires specialized features of a smooth muscle cell; smooth muscle lacks transverse striations in its constituent fibers and are almost always involuntary.	-2.55	0
ribonucleoside monophosphate biosynthetic process	The chemical reactions and pathways resulting in the formation of a ribonucleoside monophosphate, a glycosamine consisting of a base linked to a ribose sugar esterified with phosphate on its glycose moiety.	-2.55	0
mitochondrial electron transport, NADH to ubiquinone	The transfer of electrons from NADH to ubiquinone that occurs during oxidative phosphorylation, mediated by the multisubunit enzyme known as complex I.	-2.55	0
Wnt receptor signaling pathway through beta-catenin	The series of molecular signals initiated by binding of Wnt protein to a frizzled family receptor on the surface of the target cell and ending with a change in transcription of target genes.	-2.55	0
oxidation reduction	The process of removal or addition of one or more electrons with or without the concomitant removal or addition of a proton or protons.	-2.56	0
negative regulation of coagulation	Any process that stops, prevents or reduces the frequency, rate or extent of coagulation.	-2.56	0
RNA elongation	The extension of an RNA molecule after transcription initiation by the addition of ribonucleotides catalyzed by an RNA polymerase.	-2.56	1.15
regulation of fibroblast growth factor receptor signaling pathway	Any process that modulates the frequency, rate or extent of fibroblast growth factor receptor signaling pathway activity.	-2.57	0.15
protein amino acid sulfation	The addition of a sulfate group as an ester to a protein amino acid.	-2.58	0
embryonic hindlimb morphogenesis	The process, occurring in the embryo, by which the anatomical structures of the hindlimbs are generated and organized. Morphogenesis pertains to the creation of form. The hindlimbs are the posterior limbs of an animal.	-2.58	0
response to ethanol	A change in state or activity of a cell or an organism (in terms of movement, secretion, enzyme production, gene expression, etc.) as a result of an ethanol stimulus.	-2.59	0
regulation of pH	Any process that modulates the internal pH of an organism, part of an organism or a cell, measured by the concentration of the hydrogen ion.	-2.59	0
positive regulation of cellular component organization	Any process that activates or increases the frequency, rate or extent of a process involved in the formation, arrangement of constituent parts, or disassembly of cell structures, including the plasma membrane and any external encapsulating structures such as the cell wall and cell envelope.	-2.59	0
embryonic cranial skeleton morphogenesis	The process by which the anatomical structures of cranial skeleton are generated and organized during the embryonic phase. Morphogenesis pertains to the creation of form.	-2.59	0
regulation of MAPKKK cascade	Any process that modulates the frequency, rate or extent of signal transduction mediated by the MAPKKK cascade.	-2.6	0
hydrogen peroxide metabolic process	The chemical reactions and pathways involving hydrogen peroxide (H2O2), a potentially harmful byproduct of aerobic cellular respiration which can cause damage to DNA.	-2.6	0
T cell differentiation	The process by which a precursor cell type acquires characteristics of a more mature T-cell. A T cell is a type of lymphocyte whose definin characteristic is the expression of a T cell receptor complex.	-2.6	0
negative regulation of microtubule depolymerization	Any process that stops, prevents or reduces the frequency, rate or extent of microtubule depolymerization; prevention of depolymerization of a microtubule can result from binding by 'capping' at the plus end (e.g. by interaction with another cellular protein of structure) or by exposing microtubules to a stabilizing drug such as taxol.	-2.61	0
negative regulation of S phase of mitotic cell cycle	Any process that stops, prevents or reduces the frequency, rate or extent of S phase of mitotic cell cycle activity.	-2.61	1.34
embryonic development ending in birth or egg hatching	The process whose specific outcome is the progression of an embryo over time, from zygote formation until the end of the embryonic life stage. The end of the embryonic life stage is organism-specific and may be somewhat arbitrary; for mammals it is usually considered to be birth, for insects the hatching of the first instar larva from the eggshell.	-2.61	0
cellular protein localization	Any process by which a protein is transported to, and/or maintained in, a specific location within or at the surface of a cell.	-2.61	0
electron transport chain	A process whereby a series of electron carriers operate together to transfer electrons from donors to any of several different terminal electron acceptors to generate a transmembrane electrochemical gradient.	-2.62	0
positive regulation of catalytic activity	Any process that activates or increases the activity of an enzyme.	-2.63	0.78
myelination	The process by which myelin sheaths are formed and maintained around neurons. Oligodendrocytes in the brain and spinal cord and Schwann cells in the peripheral nervous system wrap axons with compact layers of their plasma membrane. Adjacent myelin segments are separated by a non-myelinated stretch of axon called a node of Ranvier.	-2.63	0
macromolecule biosynthetic process	The chemical reactions and pathways resulting in the formation of a macromolecule, any molecule of high relative molecular mass, the structure of which essentially comprises the multiple repetition of units derived, actually or conceptually, from molecules of low relative molecular mass.	-2.64	0
camera-type eye morphogenesis	The process by which the anatomical structures of the eye are generated and organized. Morphogenesis pertains to the creation of form. The camera-type eye is an organ of sight that receives light through an aperture and focuses it through a lens, projecting it on a photoreceptor field.	-2.64	0
positive regulation of chondrocyte differentiation	Any process that activates or increases the frequency, rate or extent of chondrocyte differentiation.	-2.65	-0.89
negative regulation of smooth muscle contraction	Any process that stops, prevents or reduces the frequency, rate or extent of smooth muscle contraction.	-2.65	0
microtubule-based movement	Movement of organelles, other microtubules and other particles along microtubules, mediated by motor proteins.	-2.65	0
positive regulation of macromolecule biosynthetic process	Any process that increases the rate, frequency or extent of the chemical reactions and pathways resulting in the formation of a macromolecule, any molecule of high relative molecular mass, the structure of which essentially comprises the multiple repetition of units derived, actually or conceptually, from molecules of low relative molecular mass.	-2.66	0
positive regulation of apoptosis	Any process that activates or increases the frequency, rate or extent of cell death by apoptosis.	-2.66	0
water-soluble vitamin biosynthetic process	The chemical reactions and pathways resulting in the formation of any of a diverse group of vitamins that are soluble in water.	-2.68	0
cerebral cortex development	The progression of the cerebral cortex over time from its initial formation until its mature state. The cerebral cortex is the outer layered region of the telencephalon.	-2.68	0.41
regulation of cellular component organization	Any process that modulates the frequency, rate or extent of a process involved in the formation, arrangement of constituent parts, or disassembly of cell structures, including the plasma membrane and any external encapsulating structures such as the cell wall and cell envelope.	-2.69	1.21
purine base biosynthetic process	The chemical reactions and pathways resulting in the formation of purine bases, one of the two classes of nitrogen-containing ring compounds found in DNA and RNA, which include adenine and guanine.	-2.69	0.26
negative regulation of angiogenesis	Any process that stops, prevents or reduces the frequency, rate or extent of angiogenesis.	-2.71	0
synaptic growth at neuromuscular junction	The growth of a synapse at a neuromuscular junction, the site of apposition of a motor end plate and the subneural cleft of the skeletal muscle fiber that it innervates.	-2.72	0.53
negative regulation of cell proliferation	Any process that stops, prevents or reduces the rate or extent of cell proliferation.	-2.72	0
dorsal/ventral axis specification	The establishment, maintenance and elaboration of the dorsal/ventral axis. The dorsal/ventral axis is defined by a line that runs orthogonal to both the anterior/posterior and left/right axes. The dorsal end is defined by the upper or back side of an organism. The ventral end is defined by the lower or front side of an organism.	-2.72	0
microtubule-based process	Any cellular process that depends upon or alters the microtubule cytoskeleton, that part of the cytoskeleton comprising microtubules and their associated proteins.	-2.73	0
positive regulation of endocytosis	Any process that activates or increases the frequency, rate or extent of endocytosis.	-2.74	0
proteolysis involved in cellular protein catabolic process	The hydrolysis of a peptide bond or bonds within a protein during the chemical reactions and pathways resulting in the breakdown of a protein by individual cells.	-2.75	1.88
response to osmotic stress	A change in state or activity of a cell or an organism (in terms of movement, secretion, enzyme production, gene expression, etc.) as a result of a stimulus indicating an increase or decrease in the concentration of solutes outside the organism or cell.	-2.76	0
response to cold	A change in state or activity of a cell or an organism (in terms of movement, secretion, enzyme production, gene expression, etc.) as a result of a cold stimulus, a temperature stimulus below the optimal temperature for that organism.	-2.76	0
peptidyl-serine phosphorylation	The posttranslational phosphorylation of peptidyl-serine to form peptidyl-O-phospho-L-serine.	-2.76	0
ossification	The formation of bone or of a bony substance, or the conversion of fibrous tissue or of cartilage into bone or a bony substance.	-2.77	0
muscle maintenance	The cellular homeostatic process by which a muscle fiber is preserved in a stable functional or structural state.	-2.77	0
gastrulation	A complex and coordinated series of cellular movements that occurs at the end of cleavage during embryonic development of most animals. The details of gastrulation vary from species to species, but usually result in the formation of the three primary germ layers, ectoderm, mesoderm and endoderm.	-2.77	0
definitive hemopoiesis	A second wave of blood cell production that, in vertebrates, generates long-term hemopoietic stem cells that continously provide erythroid, myeloid and lymphoid lineages throughout adulthood.	-2.77	2.13
sleep	Any process by which an organism enters and maintains a periodic, readily reversible state of reduced awareness and metabolic activity. Usually accompanied by physical relaxation, the onset of sleep in humans and other mammals is marked by a change in the electrical activity of the brain.	-2.78	0
regulation of protein homodimerization activity	Any process that modulates the frequency, rate or extent of protein homodimerization, interacting selectively with an identical protein to form a homodimer.	-2.78	0
negative regulation of adenylate cyclase activity	Any process that stops, prevents or reduces the frequency, rate or extent of adenylate cyclase activity.	-2.78	0
mitochondrial electron transport, ubiquinol to cytochrome c	The transfer of electrons from ubiquinol to cytochrome c that occurs during oxidative phosphorylation, mediated by the multisubunit enzyme known as complex III.	-2.78	0
membrane depolarization	The process in which membrane potential changes in the depolarizing direction from the resting potential, usually from negative to positive. For example, the initial depolarization during the rising phase of an action potential is in the direction from the negative resting potential towards the positive membrane potential that will be the peak of the action potential.	-2.78	0
tachykinin signaling pathway	The series of molecular signals generated as a consequence of a tachykinin, i.e. a short peptide with the terminal sequence (Phe-X-Gly-Leu-Met-NH2), binding to a cell surface receptor.	-2.8	0
substrate-bound cell migration	The orderly movement of cells from one site to another along a substrate such as the extracellular matrix; the migrating cell forms a protrusion that attaches to the substrate.	-2.8	0
regulation of synaptogenesis	Any process that modulates the frequency, rate or extent of synaptogenesis, the formation of a synapse.	-2.8	0
positive regulation of amine transport	Any process that activates, maintains or increases the frequency, rate or extent of the directed movement of amines into, out of, within or between cells.	-2.8	0
gastrulation with mouth forming second	A complex and coordinated series of cellular movements that occurs at the end of cleavage during embryonic development of most animals. In Deuterostomes the initial blastopore becomes the anus and the mouth forms second.	-2.8	0
pyrimidine nucleoside metabolic process	The chemical reactions and pathways involving any pyrimidine nucleoside, one of a family of organic molecules consisting of a pyrimidine base covalently bonded to a sugar ribose (a ribonucleoside) or deoxyribose (a deoxyribonucleoside).	-2.81	0
lipid glycosylation	Covalent attachment of a glycosyl residue to a lipid molecule.	-2.81	0
actomyosin structure organization	A process that is carried out at the cellular level which results in the formation, arrangement of constituent parts, or disassembly of cytoskeletal structures containing both actin and myosin. The myosin may be organized into filaments.	-2.81	0.12
stem cell differentiation	The process whereby a relatively unspecialized cell acquires specialized features of a stem cell. A stem cell is a cell that retains the ability to divide and proliferate throughout life to provide progenitor cells that can differentiate into specialized cells.	-2.83	1.2
penetration of zona pellucida	The infiltration by sperm of the zona pellucida to reach the oocyte. The process involves digestive enzymes from a modified lysosome called the acrosome, situated at the head of the sperm.	-2.83	0
lens morphogenesis in camera-type eye	The process by which the anatomical structures of the lens are generated and organized. Morphogenesis pertains to the creation of form. The lens is a transparent structure in the eye through which light is focused onto the retina.	-2.83	1.91
V(D)J recombination	The process by which immune receptor V, D, and J, or V and J gene segments, depending on the specific receptor, are recombined within a single locus utilizing the conserved heptamer and nonomer recombination signal sequences (RSS).	-2.83	-0.15
dopamine receptor, phospholipase C activating pathway	The series of molecular signals generated as a consequence of a dopamine receptor binding to its physiological ligand, followed by the activation of phospholipase C and the subsequent release of inositol trisphosphate.	-2.84	0
response to stress	A change in state or activity of a cell or an organism (in terms of movement, secretion, enzyme production, gene expression, etc.) as a result of a disturbance in organismal or cellular homeostasis, usually, but not necessarily, exogenous (e.g. temperature, humidity, ionizing radiation).	-2.85	0
sequestering of actin monomers	The selective interaction of actin monomers with specific molecules that inhibit their polymerization by preventing their access to other monomers.	-2.86	0
forebrain neuron development	The process whose specific outcome is the progression of a neuron that resides in the forebrain, from its initial commitment to its fate, to the fully functional differentiated cell.	-2.87	0
serine family amino acid biosynthetic process	The chemical reactions and pathways resulting in the formation of amino acids of the serine family, comprising cysteine, glycine, homoserine, selenocysteine and serine.	-2.88	0
sequestering of metal ion	The process of binding or confining metal ions such that they are separated from other components of a biological system.	-2.88	0
response to copper ion	A change in state or activity of a cell or an organism (in terms of movement, secretion, enzyme production, gene expression, etc.) as a result of a copper ion stimulus.	-2.88	0
positive regulation of secretion	Any process that activates or increases the frequency, rate or extent of the regulated release of a substance from a cell or group of cells.	-2.88	0
glycolysis	The chemical reactions and pathways resulting in the breakdown of a monosaccharide (generally glucose) into pyruvate, with the concomitant production of a small amount of ATP. Pyruvate may be converted to ethanol, lactate, or other small molecules, or fed into the TCA cycle.	-2.88	0
dicarboxylic acid transport	The directed movement of dicarboxylic acids into, out of, within or between cells.	-2.88	0
regulation of actin filament polymerization	Any process that modulates the frequency, rate or extent of the assembly of actin filaments by the addition of actin monomers to a filament.	-2.89	0
positive regulation of blood pressure	The process by which the force of blood traveling through the circulatory system is increased.	-2.89	0
inner ear development	The process whose specific outcome is the progression of the inner ear over time, from its formation to the mature structure.	-2.9	0
retina homeostasis	A tissue homeostatic process involved in the maintenance of an internal equilibrium within the retina of the eye, including control of cellular proliferation and death and control of metabolic function.	-2.91	-1.37
peptide cross-linking	The formation of a covalent cross-link between or within protein chains.	-2.91	-0.11
muscle contraction	A process whereby force is generated within muscle tissue, resulting in a change in muscle geometry. Force generation involves a chemo-mechanical energy conversion step. The chemo-mechanical energy conversion step is carried out by the actin/myosin complex activity, which generates force through ATP hydrolysis.	-2.91	0
mesoderm development	The process whose specific outcome is the progression of the mesoderm over time, from its formation to the mature structure. The mesoderm is the middle germ layer that develops into muscle, bone, cartilage, blood and connective tissue.	-2.91	0.16
fatty acid biosynthetic process	The chemical reactions and pathways resulting in the formation of a fatty acid, any of the aliphatic monocarboxylic acids that can be liberated by hydrolysis from naturally occurring fats and oils. Fatty acids are predominantly straight-chain acids of 4 to 24 carbon atoms, which may be saturated or unsaturated; branched fatty acids and hydroxy fatty acids also occur, and very long chain acids of …	-2.91	0
estrogen metabolic process	The chemical reactions and pathways involving estrogens, C18 steroid hormones that can stimulate the development of female sexual characteristics. Also found in plants.	-2.91	0
protein insertion into membrane	The process by which a protein is incorporated into a biological membrane.	-2.92	0
myeloid cell homeostasis	The process of regulating the proliferation and elimination of myeloid cells such that the total number of myeloid cells within a whole or part of an organism is stable over time in the absence of an outside stimulus.	-2.92	0
citrate metabolic process	The chemical reactions and pathways involving citrate, 2-hydroxy-1,2,3-propanetricarboyxlate. Citrate is widely distributed in nature and is an important intermediate in the TCA cycle and the glyoxylate cycle.	-2.92	-0.09
tissue morphogenesis	The process by which the anatomical structures of a tissue are generated and organized. Morphogenesis pertains to the creation of form.	-2.94	0.64
iron ion transport	The directed movement of iron (Fe) ions into, out of, within or between cells.	-2.95	0
cell migration involved in gastrulation	The migration of individual cells within the blastocyst to help establish the multi-layered body plan of the organism (gastrulation). For example, the migration of cells from the surface to the interior of the embryo (ingression).	-2.95	0.33
response to hydrogen peroxide	A change in state or activity of a cell or an organism (in terms of movement, secretion, enzyme production, gene expression, etc.) as a result of a hydrogen peroxide (H2O2) stimulus.	-2.96	0
ATP synthesis coupled proton transport	The transport of protons across a membrane to generate an electrochemical gradient (proton-motive force) that powers ATP synthesis.	-2.97	0
ER-associated protein catabolic process	The chemical reactions and pathways resulting in the breakdown of unfolded or misfolded proteins transported from the endoplasmic reticulum and targeted to cytoplasmic proteasomes for degradation.	-2.98	0
cytoskeletal anchoring at plasma membrane	Process by which cytoskeletal filaments are directly or indirectly linked to the plasma membrane.	-2.99	0
positive regulation of protein modification process	Any process that activates or increases the frequency, rate or extent of the covalent alteration of one or more amino acid residues within a protein.	-3	-0.18
protein polymerization	The process of creating protein polymers, compounds composed of a large number of component monomers; polymeric proteins may be made up of different or identical monomers. Polymerization occurs by the addition of extra monomers to an existing poly- or oligomeric protein.	-3.01	0
germ cell migration	The orderly movement of a germ cell, a cell specialized to produce haploid gametes, through the embryo from its site of production to the place where the gonads will form.	-3.01	0
cell redox homeostasis	Any process that maintains the redox environment of a cell or compartment within a cell.	-3.01	0
negative regulation of striated muscle development	Any process that stops, prevents or reduces the frequency, rate or extent of striated muscle development.	-3.02	0
generation of precursor metabolites and energy	The chemical reactions and pathways resulting in the formation of precursor metabolites, substances from which energy is derived, and any process involved in the liberation of energy from these substances.	-3.02	0
cranial nerve morphogenesis	The process by which the anatomical structure of the cranial nerves are generated and organized. Morphogenesis pertains to the creation of form. The cranial nerves are composed of twelve pairs of nerves that emanate from the nervous tissue of the hindbrain. These nerves are sensory, motor, or mixed in nature, and provide the motor and general sensory innervation of the head, neck and viscera. The…	-3.02	0
retrograde transport, endosome to Golgi	The directed movement of membrane-bounded vesicles from endosomes back to the trans-Golgi network where they are recycled for further rounds of transport.	-3.03	0
response to heat	A change in state or activity of a cell or an organism (in terms of movement, secretion, enzyme production, gene expression, etc.) as a result of a heat stimulus, a temperature stimulus above the optimal temperature for that organism.	-3.04	-0.14
glycolipid biosynthetic process	The chemical reactions and pathways resulting in the formation of glycolipid, a compound containing (usually) 1-4 linked monosaccharide residues joined by a glycosyl linkage to a lipid.	-3.05	0
positive regulation of pigmentation during development	Any process that activates or increases the deposition of coloring matter occurring during development.	-3.06	0
response to alkaloid	A change in state or activity of a cell or an organism (in terms of movement, secretion, enzyme production, gene expression, etc.) as a result of an alkaloid stimulus. Alkaloids are a large group of nitrogenous substances found in naturally in plants, many of which have extracts that are pharmacologically active.	-3.07	0
nucleoside metabolic process	The chemical reactions and pathways involving a nucleoside, a nucleobase linked to either beta-D-ribofuranose (ribonucleoside) or 2-deoxy-beta-D-ribofuranose, (a deoxyribonucleotide), e.g. adenosine, guanosine, inosine, cytidine, uridine and deoxyadenosine, deoxyguanosine, deoxycytidine and thymidine (= deoxythymidine).	-3.07	0
myofibril assembly	Formation of myofibrils, the repeating units of striated muscle.	-3.07	0
plasminogen activation	The process whereby plasminogen is processed to plasmin. This process includes both the cleavage of plasminogen between Arg560-Val561 to form plasmin and cleavage at Arg310 by plasmin or trypsin to result in the final two-chain form of plasmin held together by disulfide bonds.	-3.08	0
muscle filament sliding	The sliding of actin thin filaments and myosin thick filaments past each other in muscle contraction. This involves a process of interaction of myosin located on a thick filament with actin located on a thin filament. During this process ATP is split and forces are generated.	-3.08	0.1
intermediate filament-based process	Any cellular process that depends upon or alters the intermediate filament cytoskeleton, that part of the cytoskeleton comprising intermediate filaments and their associated proteins.	-3.08	0
embryonic forelimb morphogenesis	The process, occurring in the embryo, by which the anatomical structures of the forelimb are generated and organized. Morphogenesis pertains to the creation of form. The forelimbs are the front limbs of an animal.	-3.08	0
regulation of protein amino acid dephosphorylation	Any process that modulates the frequency, rate or extent of removal of phosphate groups from a protein.	-3.09	1.02
regulation of developmental growth	Any process that modulates the frequency, rate or extent of developmental growth.	-3.09	0.81
positive regulation of mesenchymal cell proliferation	The process of activating or increasing the rate or extent of mesenchymal cell proliferation. Mesenchymal cells are loosely organized embryonic cells.	-3.09	0
negative regulation of organelle organization	Any process that decreases the frequency, rate or extent of a process involved in the formation, arrangement of constituent parts, or disassembly of an organelle.	-3.1	0
positive regulation of signal transduction	Any process that activates or increases the frequency, rate or extent of signal transduction.	-3.11	0
response to iron ion	A change in state or activity of a cell or an organism (in terms of movement, secretion, enzyme production, gene expression, etc.) as a result of an iron ion stimulus.	-3.13	0
regulation of nuclear mRNA splicing, via spliceosome	Any process that modulates the frequency, rate or extent of mRNA splicing via a spliceosomal mechanism.	-3.13	0
regulation of mitosis	Any process that modulates the frequency, rate or extent of mitosis.	-3.13	0
regulation of cellular localization	Any process that modulates the frequency, rate or extent of a process by which a cell, a substance, or a cellular entity is transported to, or maintained in a specific location within or in the membrane of a cell.	-3.15	0
glucocorticoid receptor signaling pathway	Any series of molecular signals generated as a consequence of a glucocorticoid binding to its receptor.	-3.15	0
actin filament organization	A process that is carried out at the cellular level which results in the formation, arrangement of constituent parts, or disassembly of cytoskeletal structures comprising actin filaments. Includes processes that control the spatial distribution of actin filaments, such as organizing filaments into meshworks, bundles, or other structures, as by cross-linking.	-3.15	0.07
response to calcium ion	A change in state or activity of a cell or an organism (in terms of movement, secretion, enzyme production, gene expression, etc.) as a result of a calcium ion stimulus.	-3.2	0
morphogenesis of embryonic epithelium	The process by which the anatomical structures of embryonic epithelia are generated and organized. Morphogenesis pertains to the creation of form.	-3.22	0
glial cell fate commitment	The process whereby the developmental fate of a cell becomes restricted such that it will develop into a glial cell.	-3.23	0.3
erythrocyte differentiation	The process by which a myeloid precursor cell acquires specializes features of an erythrocyte.	-3.23	0
cell-cell junction assembly	The aggregation, arrangement and bonding together of a set of components to form a junction between cells.	-3.24	0
heart contraction	The multicellular organismal process by which the heart decreases in volume in a characteristic way to propel blood through the body.	-3.28	0
cell morphogenesis involved in differentiation	The change in form (cell shape and size) that occurs when relatively unspecialized cells, e.g. embryonic or regenerative cells, acquire specialized structural and/or functional features that characterize the cells, tissues, or organs of the mature organism or some other relatively stable phase of the organism's life history.	-3.28	0
anterior/posterior axis specification	The establishment, maintenance and elaboration of the anterior/posterior axis. The anterior-posterior axis is defined by a line that runs from the head or mouth of an organism to the tail or opposite end of the organism.	-3.28	0
ribosome assembly	The aggregation, arrangement and bonding together of the mature ribosome and of its subunits.	-3.32	0
protein stabilization	Any process involved in maintaining the structure and integrity of a protein and preventing it from degradation or aggregation.	-3.32	0
anatomical structure arrangement	The process that gives rise to the configuration of the constituent parts of an anatomical structure. This process pertains to the physical shaping of a rudimentary structure. Anatomical structures can be macroscopic such as a carpel, or microscopic such as an acrosome.	-3.32	-0.47
regulation of Wnt receptor signaling pathway	Any process that modulates the frequency, rate or extent of the activity of the Wnt receptor mediated signal transduction pathway.	-3.33	1.29
protein oligomerization	The process of creating protein oligomers, compounds composed of a small number, usually between three and ten, of component monomers; protein oligomers may be composed of different or identical monomers. Oligomers may be formed by the polymerization of a number of monomers or the depolymerization of a large protein polymer.	-3.34	0.18
post-Golgi vesicle-mediated transport	The directed movement of substances from the Golgi to other parts of the cell, including organelles and the plasma membrane, mediated by small transport vesicles.	-3.34	0
cytokinesis during cell cycle	Cytokinesis that occurs in the context of cell cycle progression and result in the division of the cytoplasm of a cell and its separation into two daughter cells.	-3.34	0
excretion	The elimination by an organism of the waste products that arise as a result of metabolic activity. These products include water, carbon dioxide (CO2), and nitrogenous compounds.	-3.37	0
positive regulation of smoothened signaling pathway	Any process that activates or increases the frequency, rate or extent of smoothened signaling.	-3.39	0
intracellular pH reduction	Any process that reduces the internal pH of a cell, measured by the concentration of the hydrogen ion.	-3.4	0
regulation of neuronal synaptic plasticity	A process that modulates neuronal synaptic plasticity, the ability of neuronal synapses to change as circumstances require. They may alter function, such as increasing or decreasing their sensitivity, or they may increase or decrease in actual numbers.	-3.41	1.48
embryonic development	The process whose specific outcome is the progression of an embryo from its formation until the end of its embryonic life stage. The end of the embryonic stage is organism-specific. For example, for mammals, the process would begin with zygote formation and end with birth. For insects, the process would begin at zygote formation and end with larval hatching. For plant zygotic embryos, this would …	-3.42	0
cell cycle process	A cellular process that is involved in the progression of biochemical and morphological phases and events that occur in a cell during successive cell replication or nuclear replication events.	-3.44	0
L-serine metabolic process	The chemical reactions and pathways involving L-serine, the L-enantiomer of serine, i.e. (2S)-2-amino-3-hydroxypropanoic acid.	-3.44	0
negative regulation of cellular metabolic process	Any process that stops, prevents or reduces the frequency, rate or extent of the chemical reactions and pathways by which individual cells transform chemical substances.	-3.45	0
rhombomere development	The process whose specific outcome is the progression of the rhombomere over time, from its formation to the mature structure. Rhombomeres are transverse segments of the developing rhombencephalon. Rhombomeres are lineage restricted, express different genes from one another, and adopt different developmental fates.	-3.46	-0.03
auditory receptor cell stereocilium organization	A process that is carried out at the cellular level which results in the formation, arrangement of constituent parts, or disassembly of a stereocilium. A stereocilium is an actin-based protrusion from the apical surface of auditory hair cells.	-3.46	0
heart trabecula formation	The process of creating a trabecula in the heart. A trabecula is a tissue element in the form of a small beam, strut or rod.	-3.47	0
regulation of skeletal muscle fiber development	Any process that modulates the frequency, rate or extent of skeletal muscle fiber development. Muscle fibres are formed by the maturation of myotubes. They can be classed as slow, intermediate/fast or fast.	-3.5	0.1
spliceosomal snRNP biogenesis	The formation and assembly from one or more snRNA and multiple protein components of a ribonucleoprotein complex that in involved in formation of the spliceosome.	-3.52	0
cytokinesis	A cellular process resulting in the division of the cytoplasm of a cell and its separation into two daughter cells. Cytokinesis usually occurs after growth, replication, and segregation of cellular components.	-3.52	0
preganglionic parasympathetic nervous system development	The process whose specific outcome is the progression of the preganglionic portion of the parasympathetic nervous system over time, from its formation to the mature structure. The parasympathetic nervous system is one of the two divisions of the vertebrate autonomic nervous system. Parasympathetic nerves emerge cranially as pre ganglionic fibers from oculomotor, facial, glossopharyngeal and vagus…	-3.54	-0.38
cerebellum development	The process whose specific outcome is the progression of the cerebellum over time, from its formation to the mature structure. The cerebellum is the portion of the brain in the back of the head between the cerebrum and the pons. In mice, the cerebellum controls balance for walking and standing, modulates the force and range of movement and is involved in the learning of motor skills.	-3.54	0
regulation of lipoprotein lipase activity	Any process that modulates the activity of the enzyme lipoprotein lipase.	-3.55	0
negative regulation of NF-kappaB transcription factor activity	Any process that stops, prevents or reduces the frequency, rate or extent of the activity of the transcription factor NF-kappaB.	-3.55	0
centrosome duplication	The replication of a centrosome, a structure comprised of a pair of centrioles and peri-centriolar material from which a microtubule spindle apparatus is organized.	-3.64	0
cellular response to reactive oxygen species	A change in state or activity of a cell (in terms of movement, secretion, enzyme production, gene expression, etc.) as a result of a reactive oxygen species stimulus. Reactive oxygen species include singlet oxygen, superoxide, and oxygen free radicals.	-3.65	0
establishment or maintenance of chromatin architecture	Any process that results in the specification, formation or maintenance of the physical structure of eukaryotic chromatin.	-3.67	1.21
glycogen metabolic process	The chemical reactions and pathways involving glycogen, a polydisperse, highly branched glucan composed of chains of D-glucose residues in alpha(1->4) glycosidic linkage, joined together by alpha(1->6) glycosidic linkages.	-3.71	0
embryonic digit morphogenesis	The process, occurring in the embryo, by which the anatomical structures of the digit are generated and organized. Morphogenesis pertains to the creation of form. A digit is one of the terminal divisions of an appendage. For example a finger or toe.	-3.71	0
negative regulation of axon extension	Any process that stops, prevents or reduces the frequency, rate or extent of axon outgrowth.	-3.74	0
group transfer coenzyme metabolic process		-3.76	0
motor axon guidance	The process by which the migration of an axon growth cone of a motor neuron is directed to a specific target site in response to a combination of attractive and repulsive cues.	-3.79	0
transcriptional preinitiation complex assembly	The aggregation, arrangement and bonding together of proteins on promoter DNA to form the transcriptional preinitiation complex (PIC), the formation of which is a prerequisite for transcription from the RNA polymerase II promoter.	-3.96	0
negative regulation of protein modification process	Any process that stops, prevents or reduces the frequency, rate or extent of the covalent alteration of one or more amino acid residues within a protein.	-3.98	1.89
negative regulation of smoothened signaling pathway	Any process that stops, prevents or reduces the frequency, rate or extent of smoothened signaling.	-4.09	0
ATP catabolic process	The chemical reactions and pathways resulting in the breakdown of ATP, adenosine 5'-triphosphate, a universally important coenzyme and enzyme regulator.	-4.35	0.06
sulfate transport	The directed movement of sulfate into, out of, within or between cells.	-4.54	0
